# Supplementary material for: Genomic Epidemiology of Carbapenemase Producing Klebsiella pneumoniae Strains at a Northern Portuguese Hospital Enables the Detection of a Misidentified Klebsiella variicola KPC-3 Producing Strain
Source: PubMed Central journal article supplement (PMC7763156; doi:10.3390/microorganisms8121986), 2020-12-13
Supplement: microorganisms-08-01986-s001.pdf [file microorganisms-08-01986-s001.pdf]

**Table S1.** Antimicrobial susceptibility of 30 *K. pneumoniae* isolates and one *K. variicola* isolate identified from 28 patients\*

| ID   | Isolate              | MLST  | Patient | Cefoxitin | Cefotaxime | Ceftazidime | Gentamicin | Imipenem | Ciprofloxacin | sxt ** |
|------|----------------------|-------|---------|-----------|------------|-------------|------------|----------|---------------|--------|
| 5141 | <i>K. pneumoniae</i> | ST147 | P1      | R (10)    | R (06)     | R (06)      | R (15)     | R (11)   | R (15)        | R (06) |
| 5142 | <i>K. pneumoniae</i> | ST147 | P2      | R (08)    | R (06)     | R (06)      | R (15)     | R (10)   | R (06)        | R (06) |
| 5144 | <i>K. pneumoniae</i> | ST147 | P3      | R (11)    | R (11)     | R (06)      | R (15)     | R (15)   | R (10)        | R (06) |
| 5147 | <i>K. pneumoniae</i> | ST147 | P4      | R (11)    | R (06)     | R (06)      | R (15)     | R (11)   | R (10)        | R (06) |
| 5151 | <i>K. pneumoniae</i> | ST147 | P5      | R (11)    | R (06)     | R (06)      | R (15)     | R (11)   | R (08)        | R (06) |
| 5152 | <i>K. pneumoniae</i> | ST147 |         | R (06)    | R (08)     | R (06)      | R (15)     | R (08)   | R (06)        | R (06) |
| 5143 | <i>K. pneumoniae</i> | ST147 | P6      | R (06)    | R (08)     | R (06)      | R (15)     | R (08)   | R (06)        | R (06) |
| 5160 | <i>K. pneumoniae</i> | ST147 | P7      | R (11)    | R (11)     | R (06)      | R (15)     | R (10)   | R (06)        | S (18) |
| 5161 | <i>K. pneumoniae</i> | ST147 | P8      | R (06)    | R (06)     | R (06)      | R (15)     | R (06)   | R (06)        | R (06) |
| 5155 | <i>K. pneumoniae</i> | ST147 | P9      | R (08)    | R (08)     | R (06)      | S (18)     | R (10)   | R (10)        | R (06) |
| 5158 | <i>K. pneumoniae</i> | ST147 | P10     | R (11)    | R (06)     | R (06)      | S (18)     | R (15)   | R (14)        | R (06) |
| 5164 | <i>K. pneumoniae</i> | ST147 | P11     | R (11)    | R (06)     | R (06)      | S (18)     | R (15)   | R (06)        | R (06) |
| 5167 | <i>K. pneumoniae</i> | ST147 | P12     | R (08)    | R (06)     | R (06)      | S (18)     | R (15)   | R (08)        | R (06) |
| 5168 | <i>K. pneumoniae</i> | ST147 | P13     | R (11)    | R (06)     | R (06)      | R (10)     | R (15)   | R (06)        | R (06) |
| 5173 | <i>K. pneumoniae</i> | ST147 | P14     | R (10)    | R (06)     | R (06)      | R (15)     | R (10)   | R (06)        | R (06) |
| 5174 | <i>K. pneumoniae</i> | ST147 | P15     | R (10)    | R (06)     | R (06)      | S (18)     | R (15)   | R (06)        | R (06) |
| 5175 | <i>K. pneumoniae</i> | ST147 | P16     | R (10)    | R (06)     | R (06)      | R (11)     | R (11)   | R (06)        | R (06) |
| 5146 | <i>K. pneumoniae</i> | ST15  | P17     | R (11)    | R (06)     | R (06)      | R (06)     | R (15)   | R (06)        | R (06) |
| 5149 | <i>K. pneumoniae</i> | ST15  | P18     | R (11)    | R (06)     | R (06)      | R (06)     | R (11)   | R (06)        | R (06) |
| 5154 | <i>K. pneumoniae</i> | ST15  | P19     | R (18)    | R (06)     | R (06)      | R (06)     | S (23)   | R (06)        | R (06) |
| 5159 | <i>K. pneumoniae</i> | ST15  | P20     | R (11)    | R (11)     | R (06)      | R (08)     | R (12)   | R (06)        | R (06) |
| 5156 | <i>K. pneumoniae</i> | ST15  |         | R (10)    | R (10)     | R (06)      | R (08)     | R (10)   | R (06)        | R (06) |
| 5157 | <i>K. pneumoniae</i> | ST15  | P21     | R (08)    | R (10)     | R (06)      | S (18)     | R (15)   | R (06)        | R (06) |

|      |                      |        |     |        |        |        |        |        |        |        |
|------|----------------------|--------|-----|--------|--------|--------|--------|--------|--------|--------|
| 5166 | <i>K. pneumoniae</i> | ST15   | P22 | R (06) | R (06) | R (06) | R (15) | R (08) | R (06) | R (06) |
| 5148 | <i>K. pneumoniae</i> | ST34   | P23 | R (06) | R (06) | R (06) | S (20) | R (06) | R (20) | S (20) |
| 5150 | <i>K. pneumoniae</i> | ST1079 | P24 | R (14) | R (06) | R (06) | R (10) | R (12) | R (21) | R (06) |
| 5153 | <i>K. pneumoniae</i> | ST29   | P25 | R (12) | R (12) | R (06) | R (11) | R (11) | R (06) | R (06) |
| 5162 | <i>K. pneumoniae</i> | ST461  | P26 | R (18) | R (14) | R (08) | R (15) | I (18) | R (21) | S (26) |
| 5165 | <i>K. pneumoniae</i> | ST307  | P27 | R (12) | R (06) | R (06) | R (06) | S (22) | R (06) | R (06) |
| 5163 | <i>K. variicola</i>  | ST4197 | P28 | R (18) | R (15) | R (08) | R (16) | R (15) | R (21) | S (23) |
| 5172 | <i>K. pneumoniae</i> | ST280  |     | R (18) | R (06) | R (08) | R (06) | R (16) | R (15) | R (06) |

\* According to EUCAST Clinical Breakpoint Tables v. 08.0, valid from 2018-01-01

\*\* sxt: Trimethoprim-sulfamethoxazole

R/I/S R - Resistant; I - Susceptible, increased exposure; S - Susceptible
